# Supplementary material
Source: PubMed Central journal article supplement (PMC1582148)
Supplement: NIHMS8008-supplement-Table_S1.pdf [file NIHMS8008-supplement-Table_S1.pdf]

**Table S1. Fission yeast strains employed in this study**

| <b>Generic Protein Name</b> | <b>Relevant genotype</b>            | <b>Strain</b> | <b>Reference</b>                            |
|-----------------------------|-------------------------------------|---------------|---------------------------------------------|
| wild type                   | wild type                           | 501           | (Manolis et al., 2001; Murray et al., 1992) |
| Dbf4                        | <i>dfp1-564</i> ( $\Delta$ 13-193)  | GBY564        | (Fung et al., 2002)                         |
| Dbf4                        | <i>dfp1-565</i> ( $\Delta$ 13-240)  | GBY565        | (Fung et al., 2002)                         |
| Dbf4                        | <i>dfp1-566</i> ( $\Delta$ 183-191) | GBY566        | (Fung et al., 2002)                         |
| Dbf4                        | <i>dfp1-AF6</i> (1-459)             | AFY6          | (Fung et al., 2002)                         |
| Dbf4                        | <i>dfp1-AF7</i> (1-376)             | AFY7          | (Fung et al., 2002)                         |
| Orc2                        | <i>orp2-2</i> (ts)                  | JLP208        | (Kiely et al., 2000)                        |
| Orc2                        | <i>orp2-7</i> (ts)                  | JLP216        | (Kiely et al., 2000)                        |
| Orc5                        | <i>orp5-H19</i> (ts)                | H19           | This study                                  |
| Orc5                        | <i>orp5-H30</i> (ts)                | H30           | This study                                  |
| Orc5                        | <i>orp5-H37</i>                     | H37           | This study                                  |

|                                                                                                                                              |                                                       |           |                              |
|----------------------------------------------------------------------------------------------------------------------------------------------|-------------------------------------------------------|-----------|------------------------------|
| Cdc6                                                                                                                                         | <i>cdc18-K46</i>                                      | Cdc18-K46 | (Greenwood et al., 1998)     |
| Ku70                                                                                                                                         | <i>pku70Δ</i>                                         | 1773      | (Manolis et al., 2001)       |
| DNA ligase IV                                                                                                                                | <i>lig4Δ</i>                                          | K1        | (Manolis et al., 2001)       |
| Damage-specific checkpoint mediator<br>(Rad9 in budding yeast)                                                                               | <i>rhp9Δ</i>                                          | sp.391    | (Willson et al., 1997)       |
| Srs2 helicase                                                                                                                                | <i>srs2Δ</i>                                          | SZ242     | (Marchetti et al., 2002)     |
| RecQ; Bloom's syndrome helicase                                                                                                              | <i>rqh1Δ</i>                                          | SZ243     | (Marchetti et al., 2002)     |
| Mre11                                                                                                                                        | <i>rad32Δ</i>                                         | EH62      | (Tavassoli et al., 1995)     |
| Rad50                                                                                                                                        | <i>rad50Δ</i>                                         | EH19      | (Marchetti et al., 2002)     |
| checkpoint-Rad proteins                                                                                                                      | <i>rad1Δ, rad3Δ, rad9Δ,<br/>rad17Δ, rad26Δ, hus1Δ</i> | Various   | (Marchetti et al., 2002)     |
| Chk1                                                                                                                                         | <i>chk1Δ</i>                                          | 1098      | (Al-Khodairy et al., 1994)   |
| Chk2/Cds1                                                                                                                                    | <i>cds1Δ</i>                                          | 1561      | (Murakami and Okayama, 1995) |
| Cdk1/Cdc2                                                                                                                                    | <i>cdc2-Y15F</i>                                      | KGY14     | (Gould and Nurse, 1989)      |
| Double mutant strains were constructed by mating, followed by selection for appropriate markers or identification of appropriate phenotypes. |                                                       |           |                              |

The column “Generic Protein Name” refers to the generic name of the protein whose gene is mutated in the indicated strain. In the column “Relevant genotype”, only the relevant mutations are indicated. Other non-relevant mutations (markers) can be found in the indicated references.

**Al-Khodairy, F., Fotou, E., Sheldrick, K. S., Griffiths, D. J., Lehmann, A. R. and Carr, A. M.**

(1994). Identification and characterization of new elements involved in checkpoint and feedback controls in fission yeast. *Mol. Biol. Cell* **5**, 147-160.

**Fung, A. D., Ou, J., Bueler, S. and Brown, G. W.** (2002). A conserved domain of

*Schizosaccharomyces pombe dfp1<sup>+</sup>* is uniquely required for chromosome stability following alkylation damage during S phase. *Mol. Cell. Biol.* **22**, 4477-4490.

**Gould, K. L. and Nurse, P.** (1989). Tyrosine phosphorylation of the fission yeast *cdc2<sup>+</sup>* protein kinase regulates entry into mitosis. *Nature* **342**, 39.

**Greenwood, E., Nishitani, H. and Nurse, P.** (1998). Cdc18p can block mitosis by two independent mechanisms. *J. Cell Sci.* **111**, 3101-3108.

**Kiely, J., Haase, S. B., Russell, P. and Leatherwood, J.** (2000). Functions of fission yeast Orp2 in DNA replication and checkpoint control. *Genetics* **154**, 599-607.

**Manolis, K. G., Nimmo, E. R., Hartsuiker, E., Carr, A. M., Jeggo, P. A. and Allshire, R. C.** (2001). Novel functional requirements for non-homologous DNA and joining in *Schizosaccharomyces pombe*. *The EMBO Journal* **20**, 210-221.

**Marchetti, M. A., Kumar, S., Hartsuiker, E., Maftahi, M., Carr, A. M., Freyer, G. A., Burhans, W.**

**C. and Huberman, J. A.** (2002). A single unbranched S-phase DNA damage and replication fork blockage checkpoint pathway. *Proceedings of the National Academy of Sciences USA* **99**, 7472-7477.

**Murakami, H. and Okayama, H.** (1995). A kinase from fission yeast responsible for blocking mitosis in S phase. *Nature* **374**, 817-819.

**Murray, J. M., Doe, C. L., Schenk, P., Carr, A. M., Lehmann, A. R. and Watts, F. Z. (1992).**

Cloning and characterisation of the *S. pombe rad15* gene, a homologue to the *S. cerevisiae RAD3* and human *ERCC2* genes. *Nucleic Acids Research* **20**, 2673-2678.

**Tavassoli, M., Shayeghi, M., Nasim, A. and Watts, F. Z. (1995).** Cloning and characterisation of the

*Schizosaccharomyces pombe rad32* gene: a gene required for repair of double strand breaks and recombination. *Nucleic Acids Research* **23**, 383-388.

**Willson, J., Wilson, S., Warr, N. and Watts, F. Z. (1997).** Isolation and characterization of the

*Schizosaccharomyces pombe rhp9* gene: a gene required for the DNA damage checkpoint but not the replication checkpoint. *Nucleic Acids Research* **25**, 2138-2145.
